# Supplementary material for: A series of lanthanide glutarates: lanthanide contraction effect on crystal frameworks of lanthanide glutarates
Source: Royal Society of Chemistry journal article supplement (doi:10.1039/c7ra01552f), 2017-01-01
Supplement: c7ra01552f1.pdf [file c7ra01552f1.pdf]

## Supporting Information

### A series of lanthanide glutarates: Lanthanide contraction effect on crystal frameworks of lanthanide glutarates

Xiao-Feng Tan, Jian Zhou,\* Hua-Hong Zou, Lianshe Fu, Qiuling Tang and Peng Wang

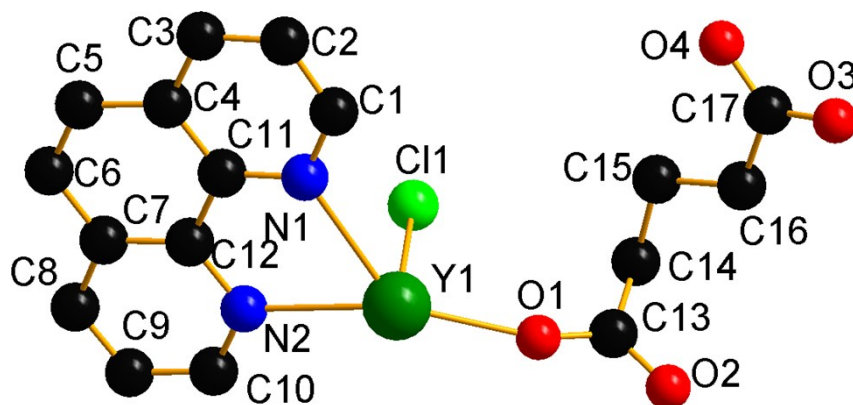

Fig. S1 The asymmetric unit of **1a**. H atoms bonded to C/N atoms have been omitted for clarity.

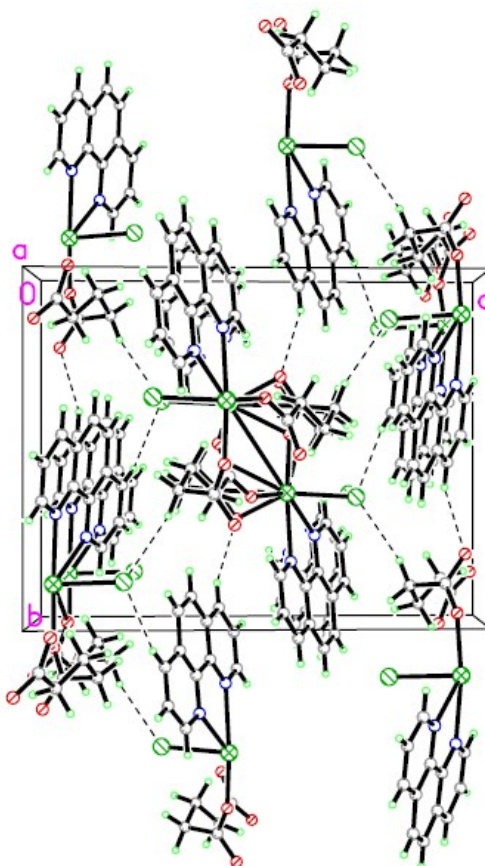

Fig. S2 3-D H-bond network structure of **1a**.

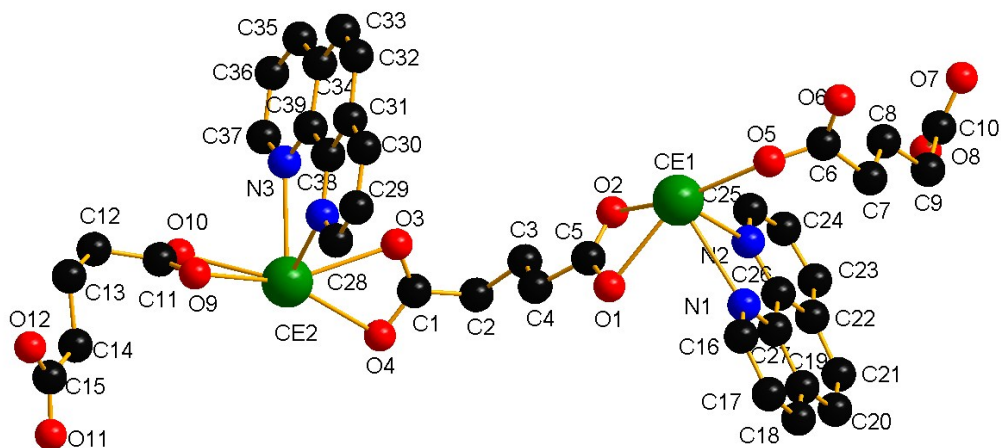

Fig. S3 The asymmetric unit of **2a**. H atoms bonded to C/N atoms have been omitted for clarity.

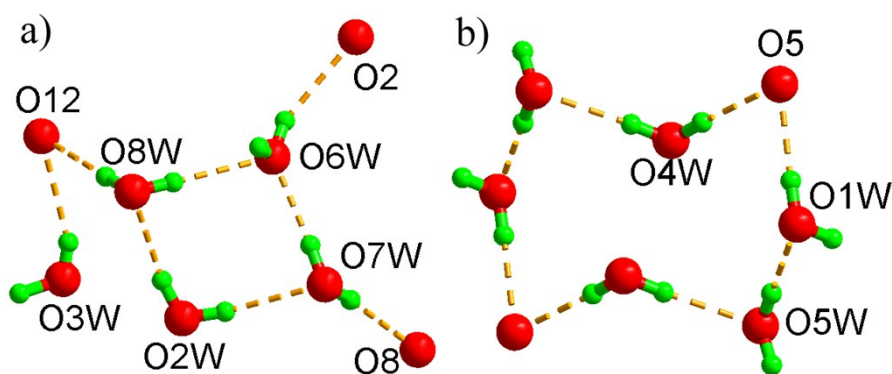

Fig. S4 The O–H···O H-bonds between the coordinated H<sub>2</sub>O molecules and free H<sub>2</sub>O molecules or O atoms of –COO– groups, showing (H<sub>2</sub>O)<sub>4</sub> ring (a) and chain-like (H<sub>2</sub>O)<sub>3</sub> unit (b).

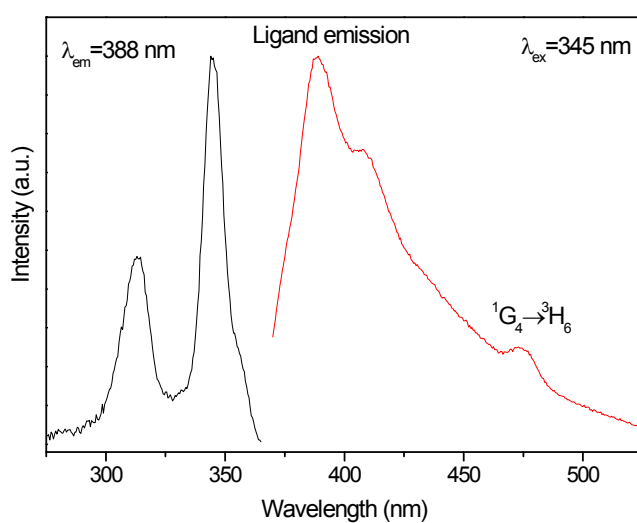

Fig. S5 Excitation (left,  $\lambda_{em}=388$  nm) and emission (right,  $\lambda_{ex}=345$  nm) spectra for **1b**.

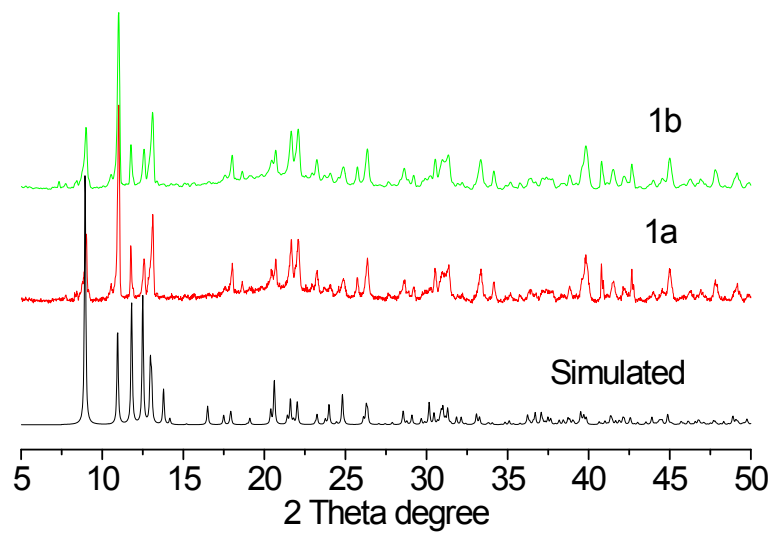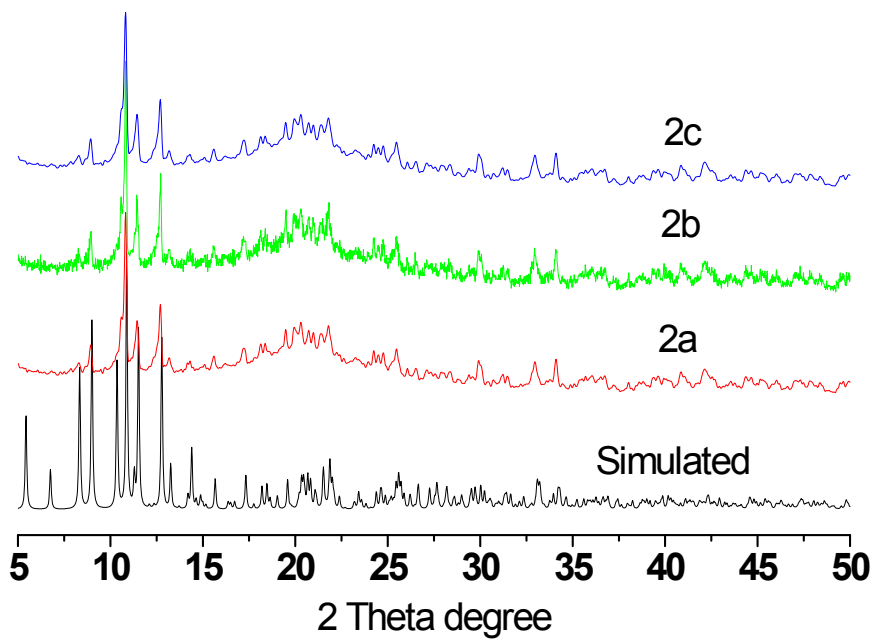

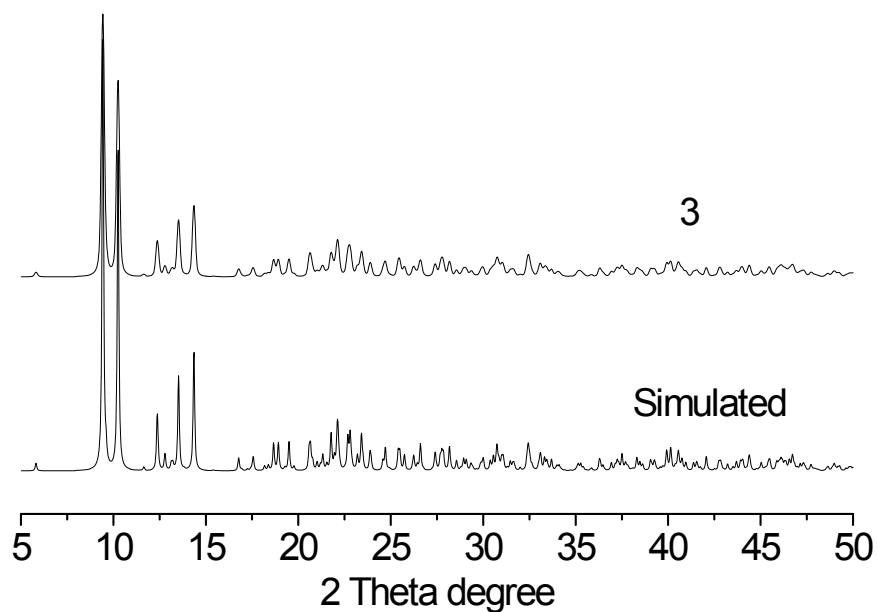

Fig. S6 Experimental powder XRD patterns of all compounds.

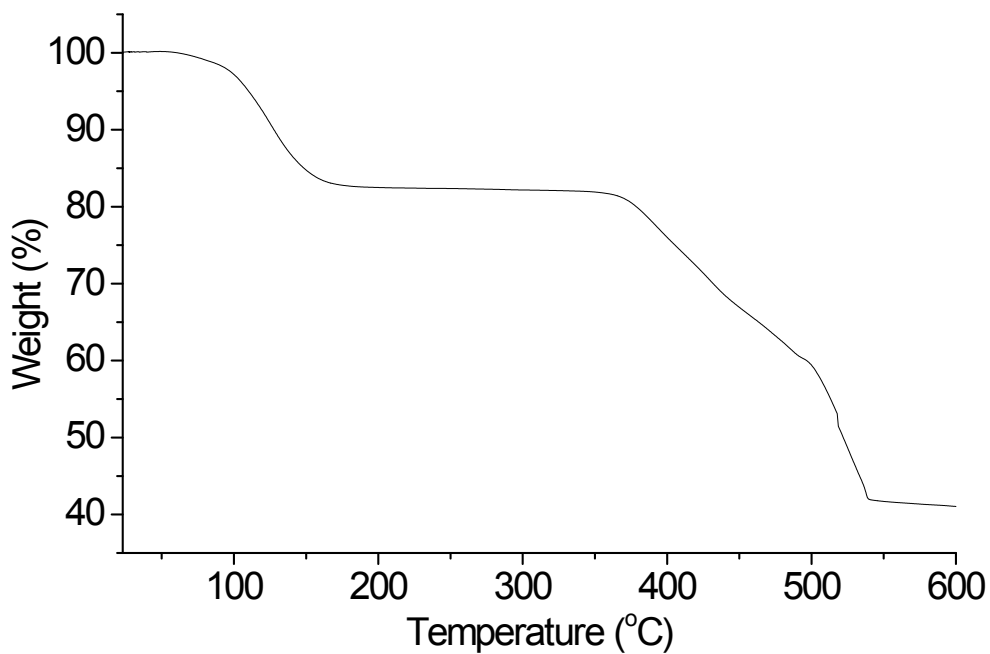

Fig. S7 Thermogravimetric analyses curve of 3.

A two-step weight loss occurs in the range of 60-550 °C, which is related to the removal of H<sub>2</sub>O molecules and the glu ligands (found, 59.1%; calcd, 59.9%).

Table S1. Hydrogen bonds for **3** [ $\text{\AA}$  and deg].

| D-H...A                | d(D-H) | d(H...A) | d(D...A) | <(DHA) |
|------------------------|--------|----------|----------|--------|
| O(1W)-H(1WC)···O(5)#3  | 0.85   | 1.93     | 2.773(4) | 175.7  |
| O(2W)-H(2WB)···O(7W)#1 | 0.85   | 2.13     | 2.946(5) | 161.0  |
| O(2W)-H(2WC)···O(8W)   | 0.85   | 2.02     | 2.834(5) | 160.2  |
| O(4W)-H(4WC)···O(5)    | 0.85   | 1.99     | 2.841(6) | 175.9  |
| O(4W)-H(4WD)···O(5W)   | 0.85   | 2.01     | 2.854(8) | 176.0  |
| O(5W)-H(5WC)···O(3)    | 0.85   | 1.90     | 2.746(5) | 177.6  |
| O(5W)-H(5WD)···O(1W)#2 | 0.85   | 1.92     | 2.769(6) | 177.6  |
| O(6W)-H(6WA)···O(2)    | 0.85   | 2.15     | 2.878(5) | 143.7  |

Symmetry transformations used to generate equivalent atoms: (#1)  $x+1,y,z$ ; (#2)  $x,y-1,z$ ; (#3)  $-x+2,-y+1,-z+2$ .
